# Supplementary material
Source: publisher figshare collection journal article supplement (https://geolsoc.figshare.com/articles/dataset/_/3453101)

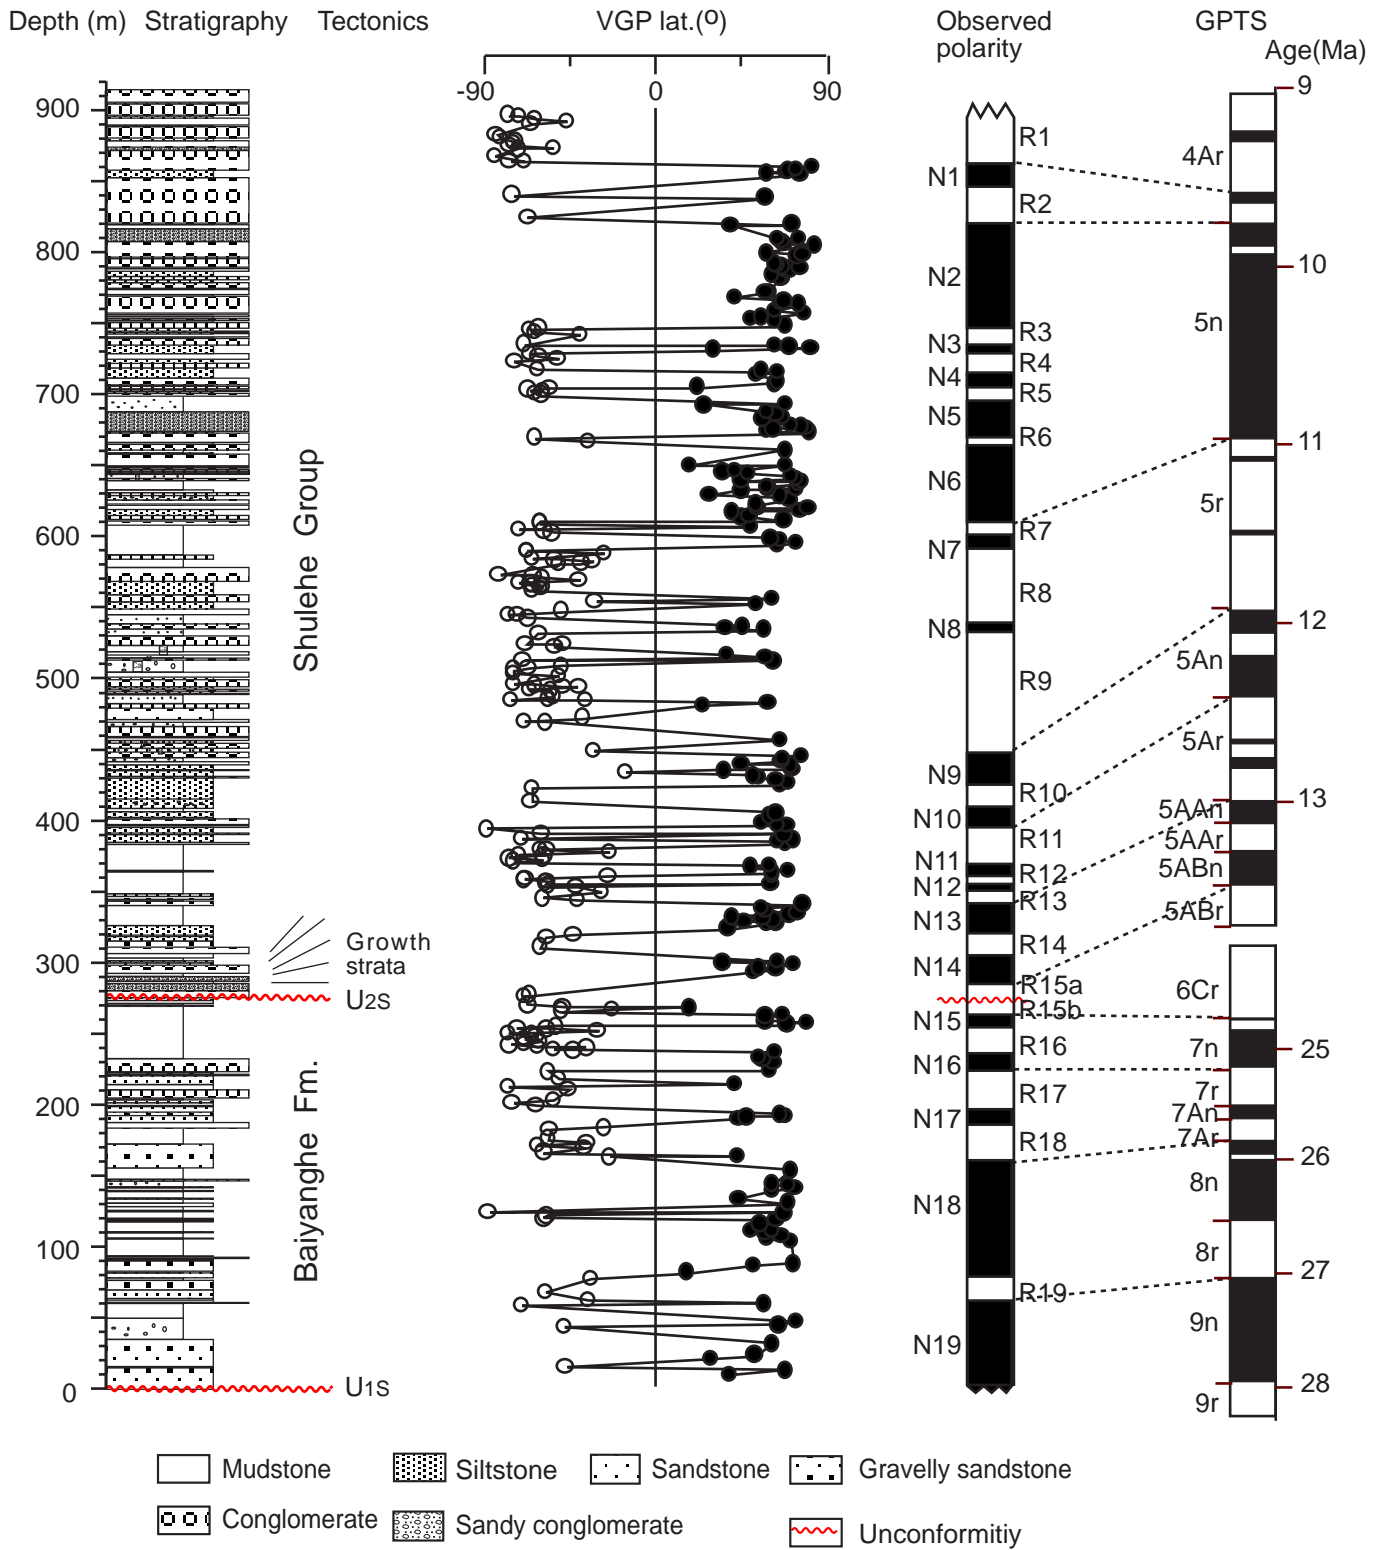

**Online Supplementary Data Figure C**

Supplement: Supplementary file 1 [file 1]

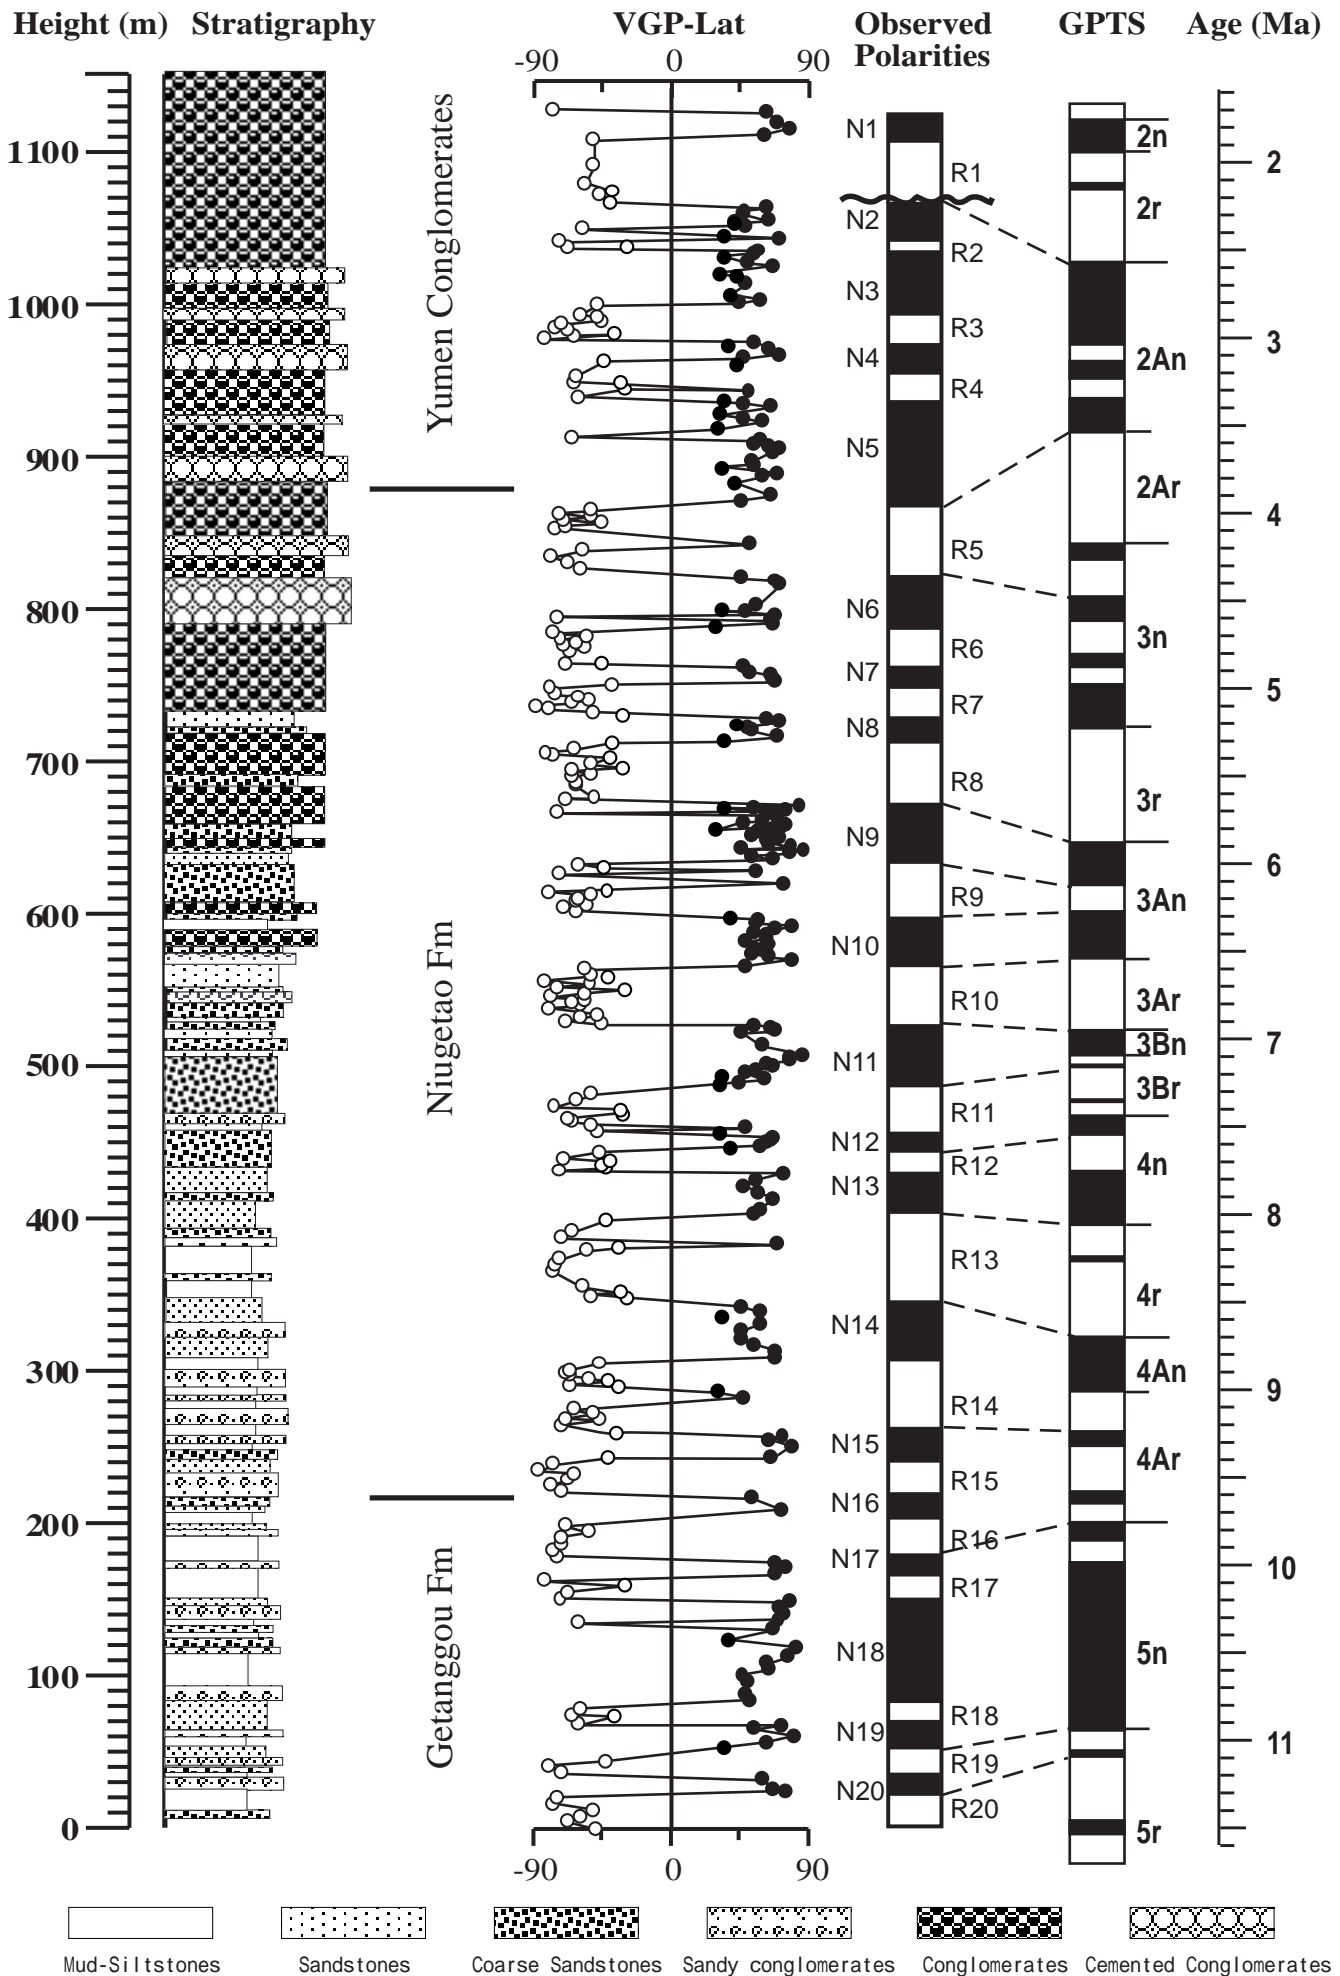

**Online Supplementary Data Figure B**

Supplement: Supplementary file 2 [file 1]

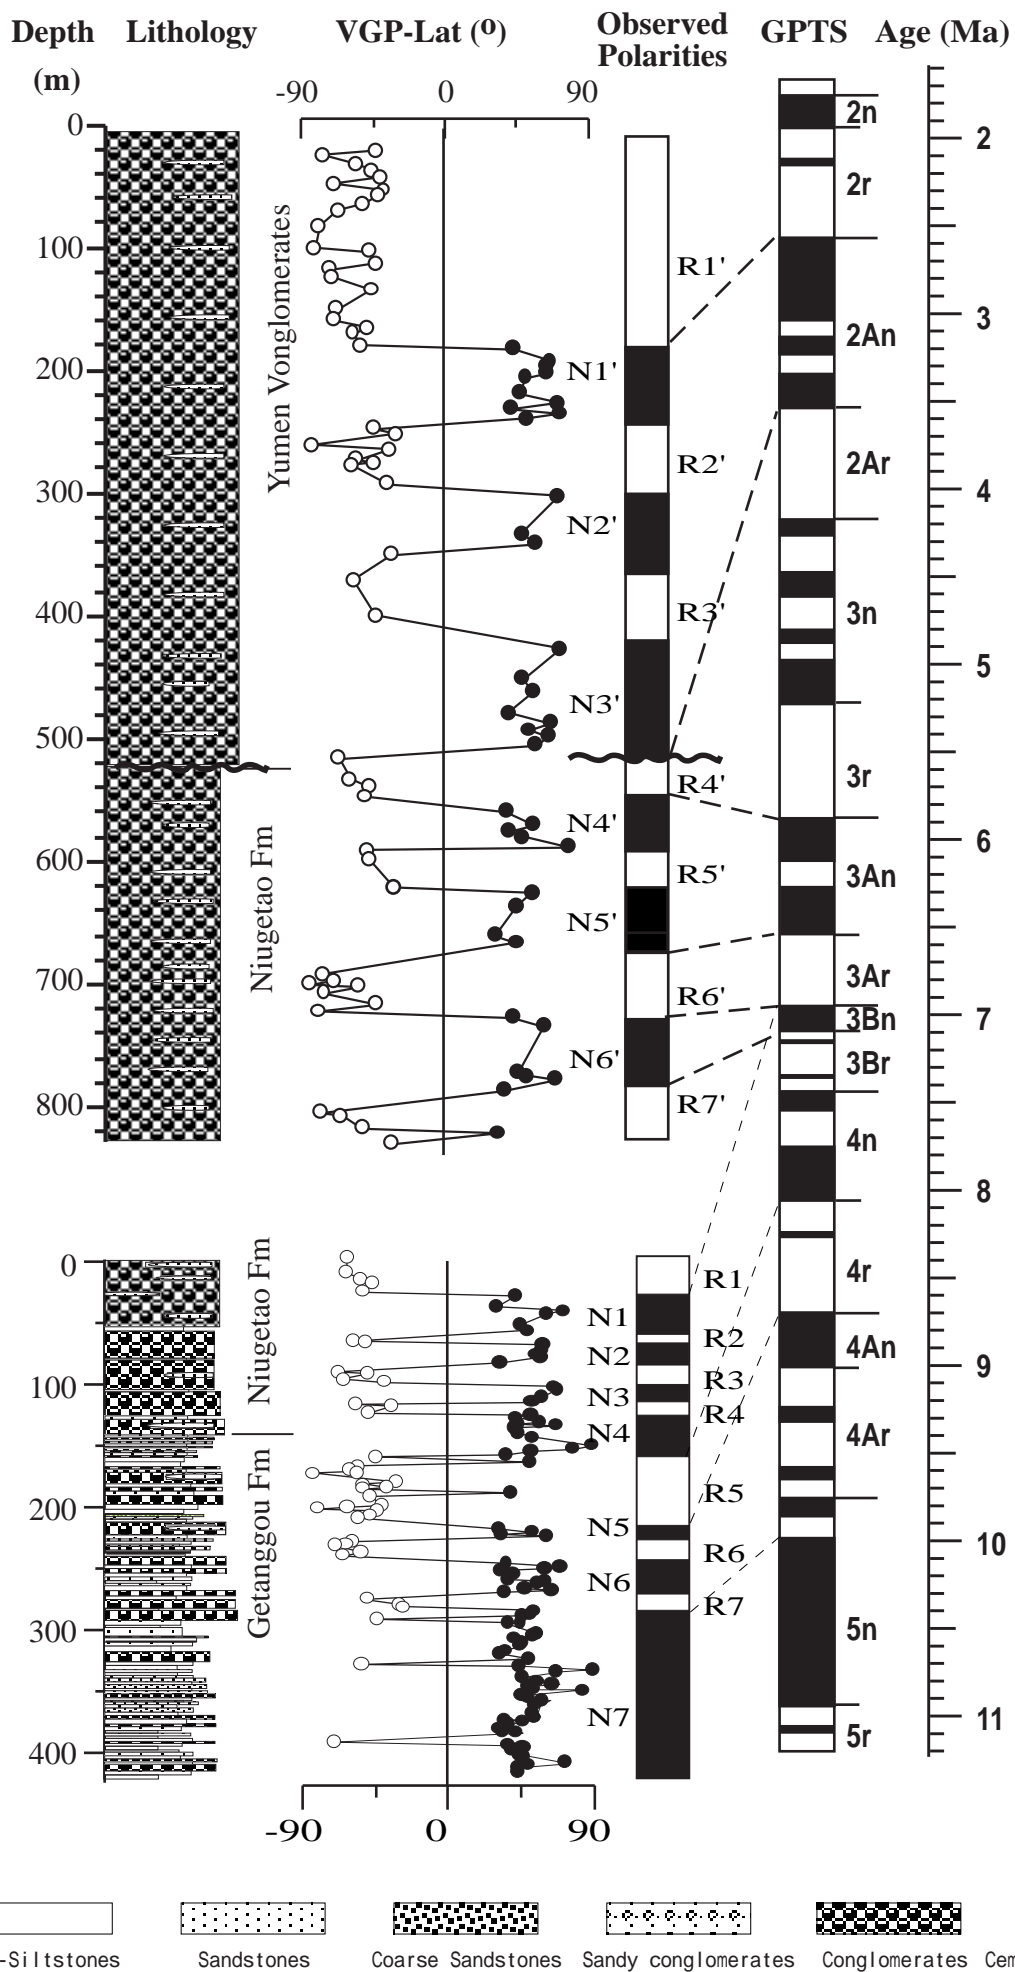

**Online Supplementary Data Figure A**

Supplement: Supplementary file 3 [file 1]
